# Supplementary material
Source: MDPI journal article supplement (https://www.mdpi.com/search?q=materials-13-04113)
Supplement: s001 [file materials-13-04113-s001.pdf]

Supplementary Information

# Thermal Stability and Decomposition Products of P-Doped Ferrihydrite

Gabriela Pieczara <sup>1</sup>, Maciej Manecki <sup>1,\*</sup>, Grzegorz Rzepa <sup>1</sup>, Olaf Borkiewicz <sup>2</sup> and Adam Gawel <sup>1</sup>

<sup>1</sup> Faculty of Geology, Geophysics and Environmental Protection, AGH-University of Science and Technology, al. Mickiewicza 30, 30-059 Kraków, Poland; gabriela.pieczara@gmail.com (G.P.); grzepa@cyf-kr.edu.pl (G.R.); agawel@agh.edu.pl (A.G.)

<sup>2</sup> X-ray Science Division, Advanced Photon Source, Argonne National Laboratory, Argonne, Illinois 60439, USA; borkiewicz@aps.anl.gov

\* Correspondence: gpmmanec@cyf-kr.edu.pl; Tel.: +48-604-427-198

Received: 18 August 2020; Accepted: 14 September 2020; Published: date

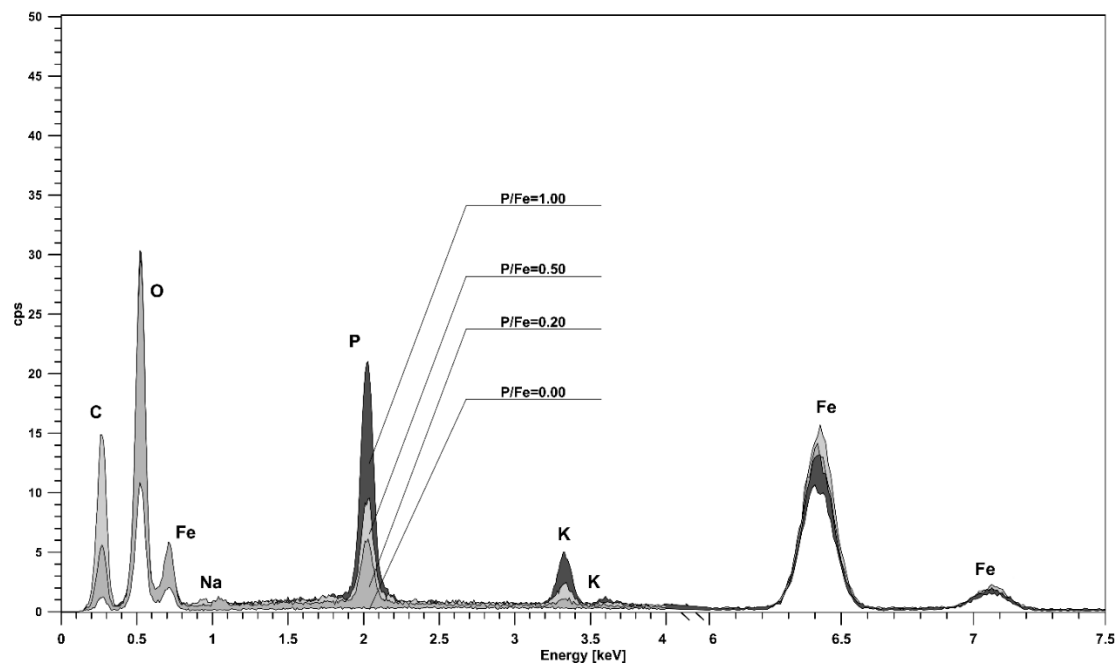

**Figure S1.** Comparison of EDS spectra of pure and P-doped ferrihydrites.

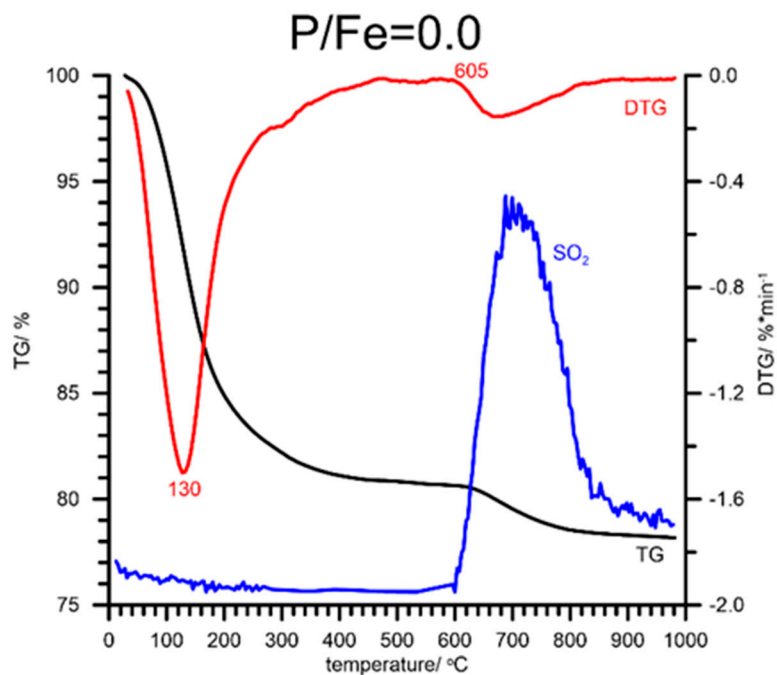

**Figure S2.** Quadrupole mass spectrometry (QMS) signal recording a release of  $\text{SO}_2$  between 600 and 800 °C.

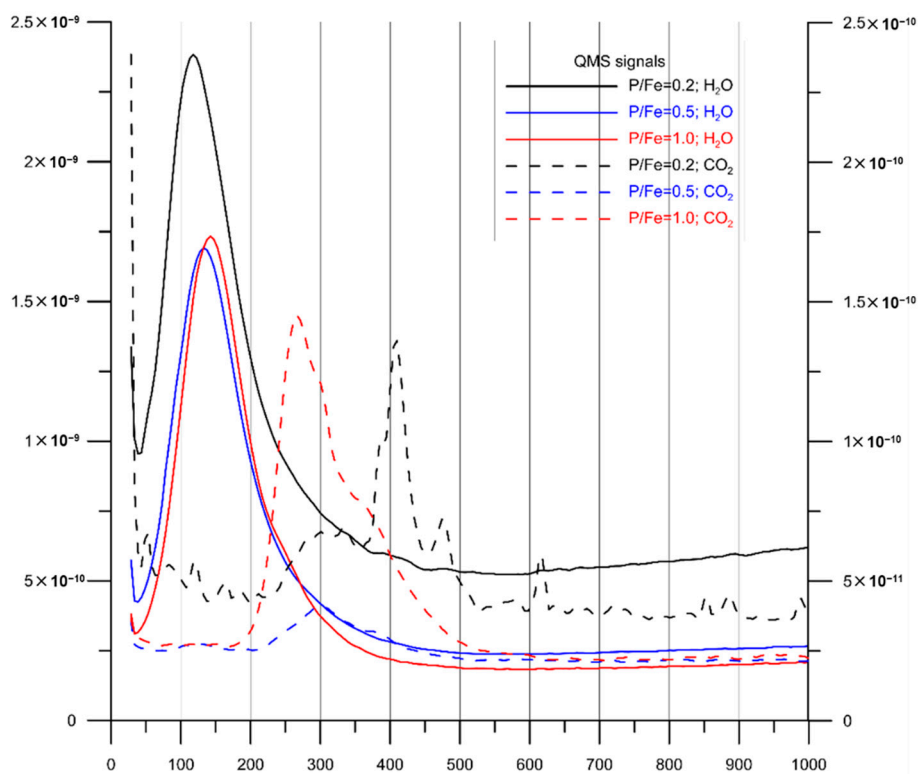

**Figure S3.** Quadrupole mass spectrometry (QMS) signal recording a release of  $\text{H}_2\text{O}$  and  $\text{CO}_2$  upon heating of P-doped ferrihydrite.

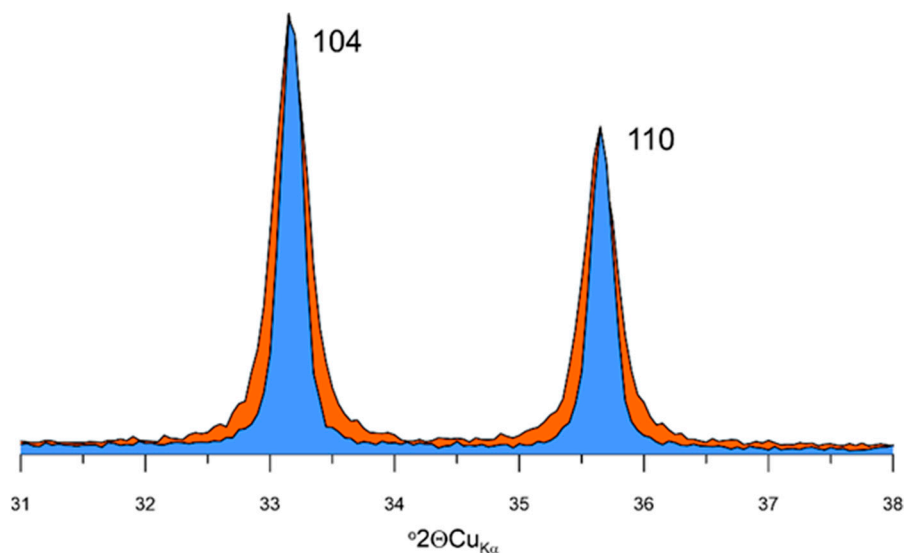

**Figure S4.** Fragment of XRD pattern of hematite resulting from heating of sample FHYD-0.2 to 900 °C (narrower, blue pattern) and to 1000 °C (broader, red pattern) resulting probably from incorporation of P into hematite solid solution.

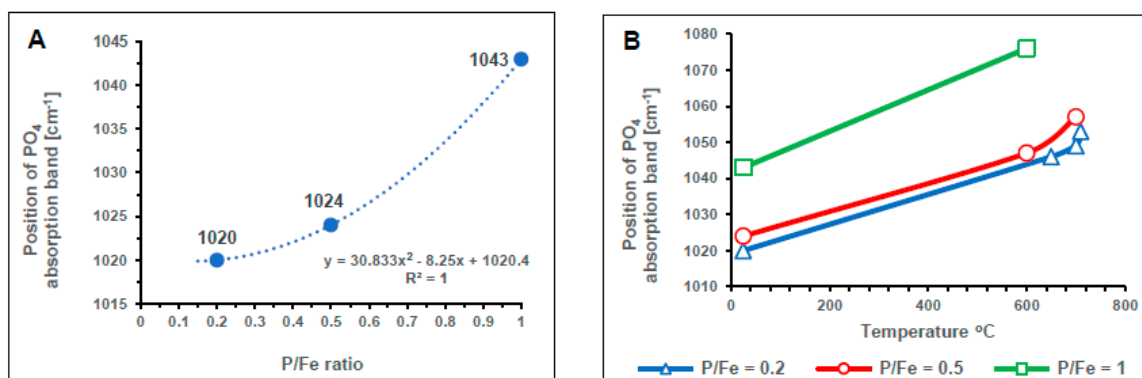

**Figure S5. A.** Systematic shift of the main PO<sub>4</sub> absorption band position on IR spectra for P-doped ferrihydrites. The position of the band in the spectrum can be used to estimate the P content in ferrihydrite. **B.** The effect of temperature on the shift of absorption bands originating from PO<sub>4</sub> is almost identical for P-poor and P-rich ferrihydrites.

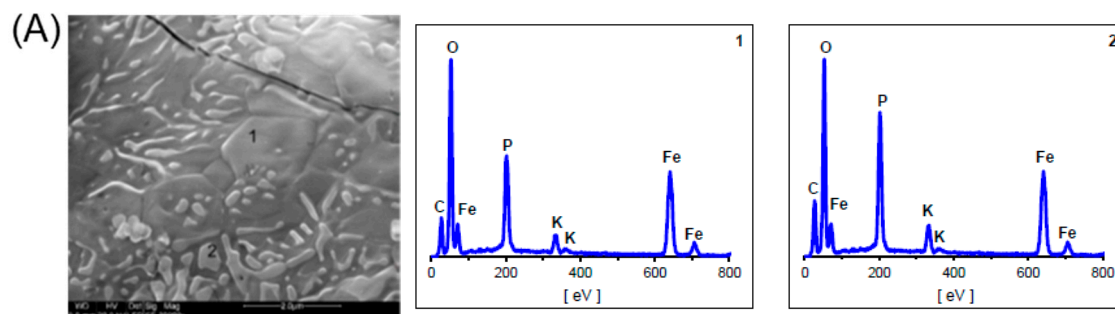

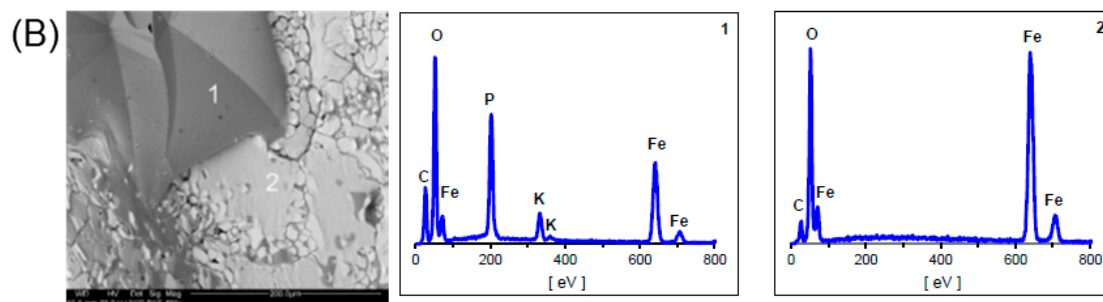

**Figure S6.** SEM image and EDS spectra of products of P-rich ferrihydrite (FHYD-1.0) heating to 800 °C (A) and to 1000 °C (B).

**Table S1.** Comparison of the position of major thermal effects apparent on DTA curves for pure and P-doped ferrihydrites.

|                                                              | P/Fe | 0.0            | 0.2 | 0.5 | 1.0 |
|--------------------------------------------------------------|------|----------------|-----|-----|-----|
| Dominating processes responsible for thermal effect          |      | Temperature °C |     |     |     |
| Removal of surface moisture                                  | endo | 137            | 133 | 141 | 146 |
| Ferrihydrite collapse                                        | exo  | 460            | 558 | 565 | 568 |
| Formation of nanomaghemite                                   | exo  |                | 658 | 680 | 677 |
| Formation of Fe-phosphates and rodolicoite                   | exo  |                | 722 | 717 |     |
| Formation of hematite and transformation of Fe-phosphates    | exo  |                | 855 | 865 | 860 |
| Transformation of rodolicoite and formation of grattarolaite | exo  |                |     | 915 | 884 |

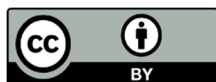

© 2020 by the authors. Submitted for possible open access publication under the terms and conditions of the Creative Commons Attribution (CC BY) license (<http://creativecommons.org/licenses/by/4.0/>).
